# Supplementary material
Source: PubMed Central journal article supplement (PMC9380551)
Supplement: aac.00083-22-s0001.pdf [file aac.00083-22-s0001.pdf]

| Chimiotheque   |             |                      |                    |                       |                     |              |                 |        |         |
|----------------|-------------|----------------------|--------------------|-----------------------|---------------------|--------------|-----------------|--------|---------|
| Docking Scores |             |                      |                    |                       |                     |              |                 |        |         |
| Ranking        | Reference   | PLP Score, S Protein | PLP Score, Complex | Vina Score, S Protein | Vina Score, Complex | Database     | Total Molweight | cLogP  | cLogS   |
| 1              | AB-00022018 | 78.37                | 73.90              | -8.6                  | -8.3                | Chimiotheque | 945.687         | 4.6851 | -6.929  |
| 2              | AB-00011778 | 67.91                | 68.38              | -9.0                  | -8.5                | Chimiotheque | 766.664         | 7.4365 | -15.107 |
| 3              | AB-00047476 | 65.35                | 78.98              | -9.4                  | -10.8               | Chimiotheque | 692.721         | 10.897 | -12.992 |
| 4              | AB-00069263 | 64.40                | 52.45              | -8.2                  | -8.4                | Chimiotheque | 633.303         | 5.5531 | -7.944  |
| 5a             | AB-00054784 | 64.18                | 65.73              | -8.9                  | -8.9                | Chimiotheque | 595.406         | 2.4006 | -7.442  |
| 5b             | AB-00054798 | 60.02                | 55.92              | -8.6                  | -8.9                | Chimiotheque | 611.405         | 1.9867 | -7.116  |
| 5c             | AB-00074850 | 59.99                | 61.34              | -8.7                  | -8.9                | Chimiotheque | 571.384         | 1.6288 | -6.97   |
| 5d             | AB-00054783 | 59.81                | 65.04              | -8.8                  | -9.2                | Chimiotheque | 652.400         | 2.905  | -7.876  |
| 6              | AB-00054838 | 57.47                | 50.47              | -8.6                  | -8.8                | Chimiotheque | 514.396         | 2.4105 | -7.519  |
| 7              | AB-00057531 | 57.37                | 56.76              | -9.0                  | -9.2                | Chimiotheque | 606.320         | 5.7237 | -10.631 |

  

| Chemoteca      |             |                      |                    |                       |                     |           |                 |        |        |
|----------------|-------------|----------------------|--------------------|-----------------------|---------------------|-----------|-----------------|--------|--------|
| Docking Scores |             |                      |                    |                       |                     |           |                 |        |        |
| Ranking        | Reference   | PLP Score, S Protein | PLP Score, Complex | Vina Score, S Protein | Vina Score, Complex | Database  | Total Molweight | cLogP  | cLogS  |
| 1              | CMLDID9186  | 69.76                | 68.59              | -8.3                  | -8.5                | Chemoteca | 492.486         | 2.2402 | -6.321 |
| 2              | CMLDID20542 | 59.49                | 62.84              | -8.4                  | -8.2                | Chemoteca | 411.380         | 3.1201 | -4.755 |
| 3              | CMLDID51080 | 58.54                | 70.13              | -8.3                  | -8.8                | Chemoteca | 328.399         | 0.1693 | -1.876 |
| 4              | CMLDID55995 | 58.11                | 58.15              | -8.3                  | -8.4                | Chemoteca | 493.514         | 2.1139 | -6.322 |
| 5              | CMLDID1197  | 57.86                | 60.47              | -8.6                  | -8.4                | Chemoteca | 352.708         | 1.7547 | -4.49  |

  

| IPPI-DB        |             |                      |                    |                       |                     |          |                 |        |        |
|----------------|-------------|----------------------|--------------------|-----------------------|---------------------|----------|-----------------|--------|--------|
| Docking Scores |             |                      |                    |                       |                     |          |                 |        |        |
| Ranking        | Reference   | PLP Score, S Protein | PLP Score, Complex | Vina Score, S Protein | Vina Score, Complex | Database | Total Molweight | cLogP  | cLogS  |
| 1              | IPPI-DB218  | 67.20                | 65.00              | -8.7                  | -9.2                | IPPI-DB  | 622.990         | 4.5836 | -7.022 |
| 2              | IPPI-DB269  | 64.69                | 50.62              | -8.7                  | -9.5                | IPPI-DB  | 592.964         | 4.6926 | -7.368 |
| 3              | IPPI-DB1202 | 63.08                | 60.73              | -8.2                  | -6.8                | IPPI-DB  | 919.717         | 8.3977 | -9.953 |
| 4              | IPPI-DB632  | 62.82                | 59.56              | -8.4                  | -6.3                | IPPI-DB  | 591.750         | 5.4497 | -6.238 |
| 5              | IPPI-DB886  | 60.45                | 69.70              | -8.5                  | -8.1                | IPPI-DB  | 987.631         | 7.3494 | -8.382 |

  

| ZINC FDA Approved |                  |                      |                    |                       |                     |                   |                 |         |        |
|-------------------|------------------|----------------------|--------------------|-----------------------|---------------------|-------------------|-----------------|---------|--------|
| Docking Scores    |                  |                      |                    |                       |                     |                   |                 |         |        |
| Name              | Reference        | PLP Score, S Protein | PLP Score, Complex | Vina Score, S Protein | Vina Score, Complex | Database          | Total Molweight | cLogP   | cLogS  |
| Venetoclax        | ZINC000150338755 | 83.01                | 66.81              | -8.5                  | -9.5                | FDA Approved Zinc | 761.846         | 4.527   | -5.064 |
| Unoprostone       | ZINC00008214703  | 76.11                | 62.50              | -7.8                  | -7.1                | FDA Approved Zinc | 382.539         | 4.7789  | -4.351 |
| Paromomycin       | ZINC000060183170 | 75.29                | 55.54              | -8.1                  | -7.7                | FDA Approved Zinc | 615.631         | -9.1987 | 0.236  |
| Lifitegrast       | ZINC000084668739 | 56.71                | 51.57              | -7.5                  | -8.4                | FDA Approved Zinc | 615.489         | 3.9144  | -7.272 |
| Nilotinib         | ZINC000006716957 | 54.20                | 56.04              | -8.4                  | -8.6                | FDA Approved Zinc | 529.525         | 5.1058  | -8.55  |

**S1. Best selected compounds from the virtual screening.** 100 ns molecular dynamics simulation was used with AMBER force field and TIP3P water box on the published S/ACE1 complex. The MuTaLig Virtual Chemotheqa (ca. 60,000 molecules, <http://chemotheqa.unicz.it>), the ZINC FDA Approved and ZINC In-trials Database (1379 and 5811 molecules for evaluation for Drug Repurposing, <https://zinc.docking.org>), The French National chemical library (Chimiothèque Nationale) (70,000 molecules, <https://chembiofrance.cn.cnrs.fr/fr/>), and the Inhibitors of Protein-Protein Interactions Database (1,956 molecules, <https://ippidb.pasteur.fr/>) were used for the screen. The best compounds from each library were then sorted and reported here.

## Chimoteque

Score GOLD PLP (S Protein)

Score Autodock Vina (S Protein) (kcal/mol)

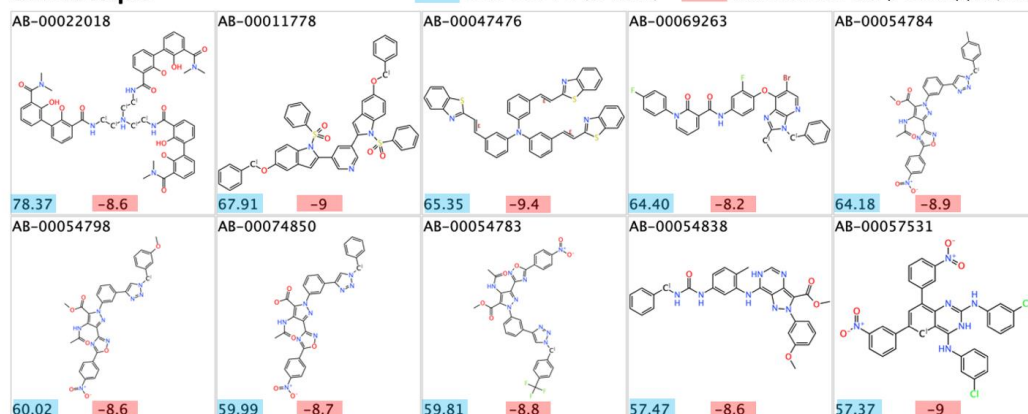

## Chemoteca

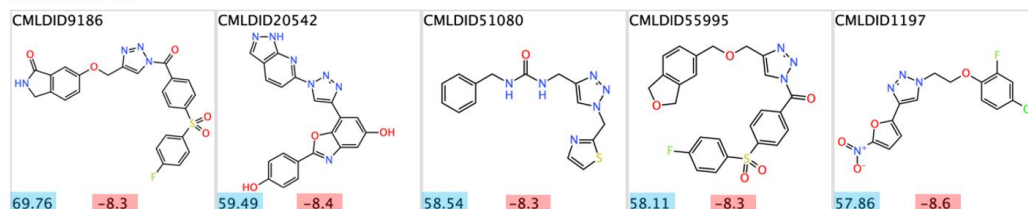

## IPPI-DB

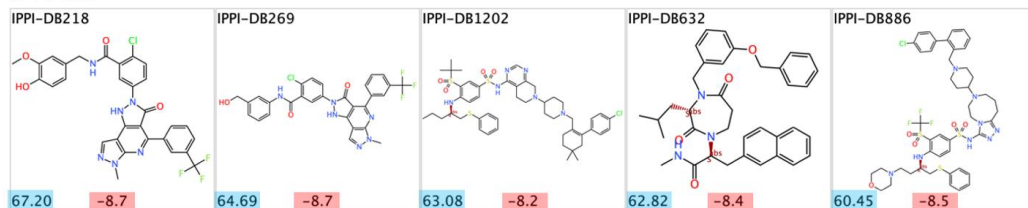

## ZINC FDA Approved

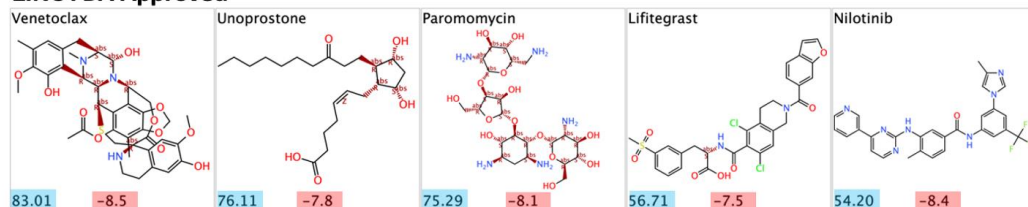

**S2. Structure of the best selected compounds.** The VINA and PLP scores were also reported in the figure. The compounds are listed with two different scoring functions and their calculated molecular parameters. Charts with VINA scores (the more negative the better) and PLP scores (the higher the better) are shown

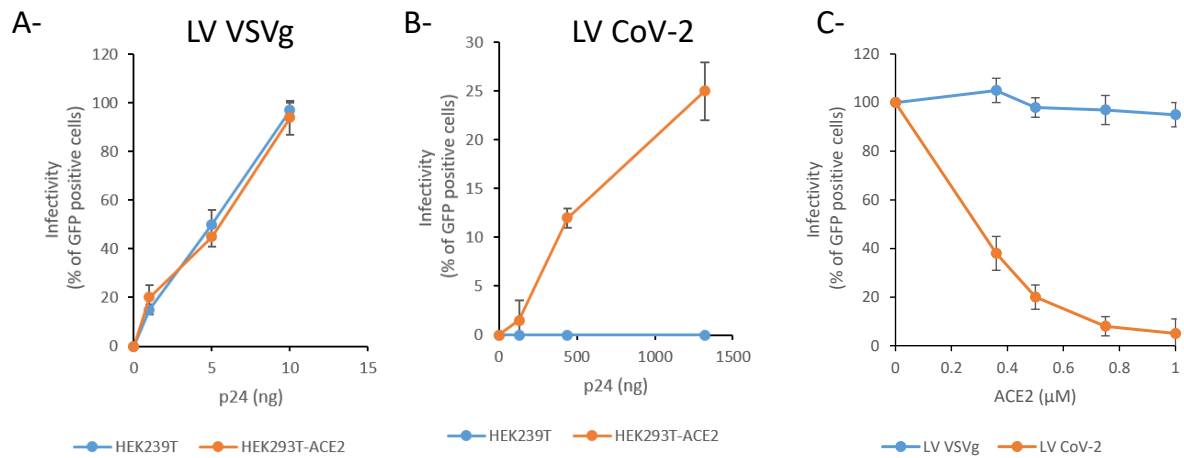

**S3. Infectivity of the lentiviruses pseudotyped with the SARS-CoV-2 S protein (LV CoV-2) or the VSVg glycoprotein (LV VSVg) in HEK293T and HEK293T-ACE2 cells.** LV VSVg (A) and LV CoV-2 (B) have been used for transducing HEK293T or HEK293T-Ace2 cells with increasing MOI reported as ng of p24. The infectivity was measured the percentage of GFP positive cells by flow cytometry. Increasing concentrations of soluble ACE2 protein have been added to the CoV-2 or VSVg LVs before transduction (C). Data are shown as means of at least three independent experiments  $\pm$  standard deviation (SD).

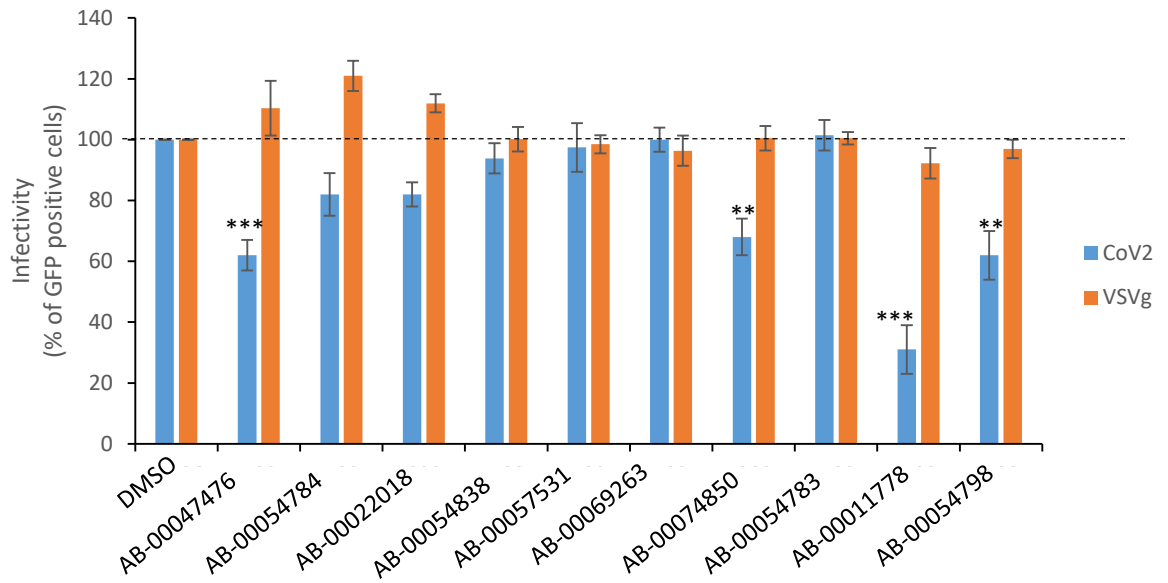

**S4. Screening of CN drugs inhibiting SARS-CoV-2 entry using a lentiviral pseudovirus system.** Drugs were tested for their infectivity of both VSVg and SARS-CoV-2 S pseudotyped lentiviruses in HEK293T-ACE2 cells at 10 $\mu$ M. AB-00047476 and AB-00011778 were selected for further characterization using increasing concentrations of drug (see **Figure 2**). Data are shown as the means of at least three independent experiments  $\pm$  the standard deviations. \*\*\* $p$ <0.001, \*\* $p$ <0.01 (Student's t-test).

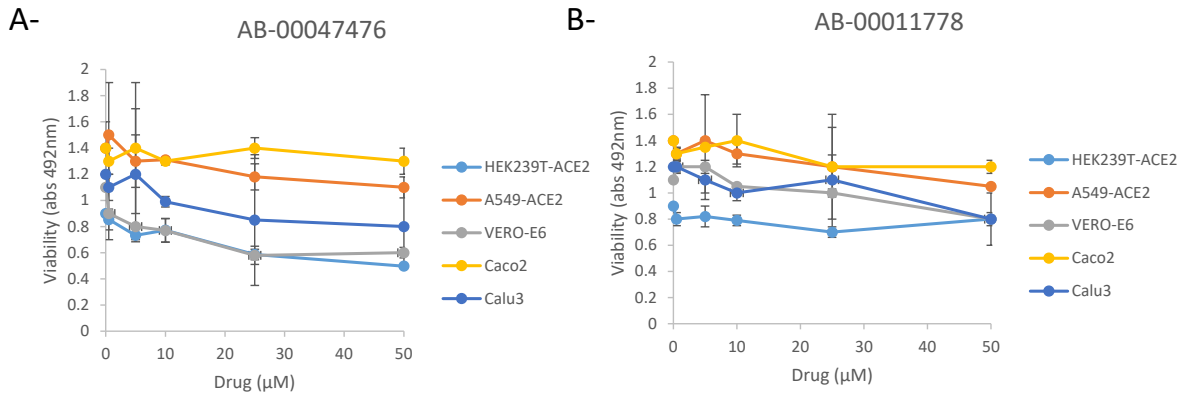

**S5. Cytotoxicity of AB-00047476 and AB-00011778 compounds in various cell lines.** Cells were seeded at the density of 20,000 cells/well in a 96 well plate containing 100 µL complete DMEM (Gibco, USA) supplemented with 10% FBS (Gibco, USA) and 1% Penstrep (Gibco, USA). Cells were incubated for 12 hours at 37° C in humidified 5% CO<sub>2</sub> incubator for adherence. After 12-hour incubation, the media was replaced with fresh media, and cells were treated with compounds. Untreated cells were considered as negative control, DMSO treated cells were considered as the vehicles. After the treatment, cells were incubated at 37 ° C in humidified 5% CO<sub>2</sub> incubator. 48-hour post-treatment, 20 µL of MTT substrate (5 mg/mL) was added in each well and incubated for 4 additional hours at 37° C in the dark. The media was then carefully removed, and 492nm absorbance was measured. The viability of the cells (492nm absorbance in MTT assay) was plotted against the increasing concentration of drugs. Data are shown as means of at three independent experiments. Data are shown as means of five independent experiments ± (SD).

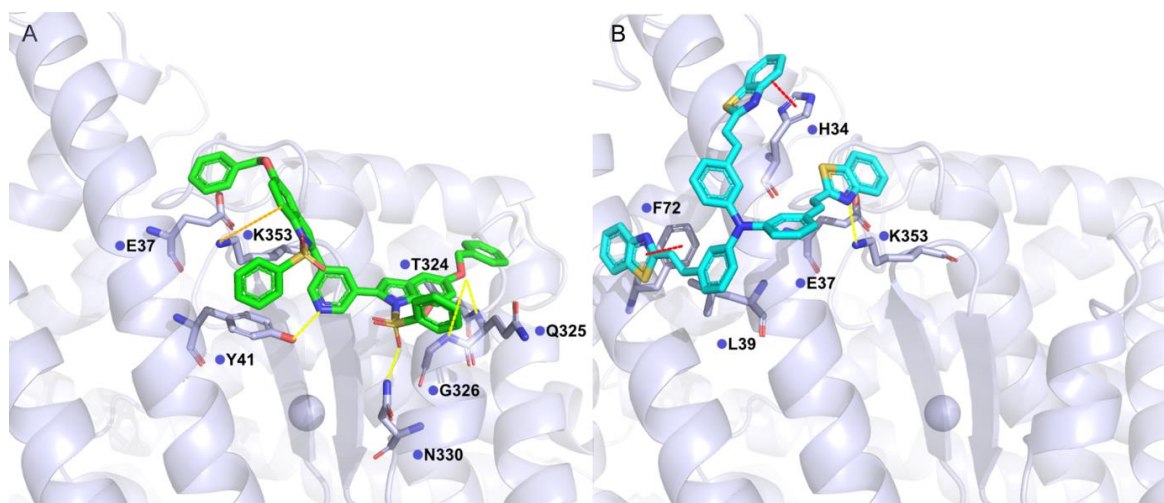

**S6. Molecular docking of AB-00011778 and AB-00047476 and ACE2 alone.** Data were obtained from the predicted binding poses of the compounds to ACE2 around the interface region. The interacting amino acid residues are highlighted. (A) AB-00011778 bound to ACE2 alone; (B) AB-00047476 bound to ACE2 alone.

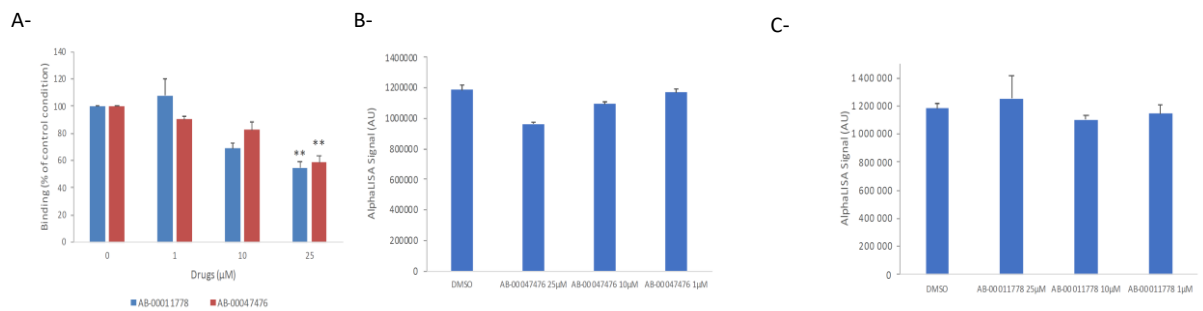

**S7. Effects of AB-00011778 and AB-00047476 on the *in vitro* S-RBD/ACE2 interaction using AlphaLISA and biolayer interferometry (BLI) technologies.** An optimal final concentration of 3nM for each recombinant protein was previously established with cross-titration experiments. Proteins were diluted in the binding buffer (phosphate-buffered saline (PBS) pH 7.4, 0.1% (w/v) bovine serum albumin). For the AlphaLISA competition assay, increasing concentrations of AB-00011778 and AB-00047476 drugs (1 to 25  $\mu\text{M}$ , 1% DMSO final concentration) were preincubated with S-RBD(His)<sub>6</sub> for 30 min before being mixed with ACE2-Biot for 2h with rotation at room temperature. Next, 5 $\mu\text{L}$  of anti-6X His acceptor beads (Perkin Elmer, reference AL178) were added and after 1h of incubation at RT with rotation, 5  $\mu\text{L}$  of streptavidin donor acceptor beads (Perkin Elmer, reference 6760002) were also mixed to the wells. This established a final concentration of 20  $\mu\text{g}/\text{mL}$  for each bead. The plate was then incubated for 1h at RT in the dark before the AlphaLISA signal was detected using an EnSpire Multimode Plate Reader (Perkin Elmer). Negative control with binding buffer was used to control the assay quality. For the competition assay (A), increasing concentrations (1 to 25  $\mu\text{M}$ ) of AB-00011778 and AB-00047476 were preincubated with S-RBD(His)<sub>6</sub> in the plate before being mixed with ACE2-Biot for 2 h. Anti-6XHis acceptor and streptavidin donor beads were used for complex capture after 2 h of incubation with the two partners. Increasing concentrations of AB-00011778 and AB-00047476 were incubated for 30 min with S-RBD(His)<sub>6</sub> before being mixed with ACE2-Biot for 2 h. The microplate results were read after 2 h of incubation with the anti-6X His acceptor and streptavidin donor beads. AB-00047476 (B) and AB-00011778 (C) have been then tested for their propriety to interfere with the AlphaLISA interaction signal using the Truehits counterscreen kit following the manufacturer conditions (PerkinElmer). Data are shown as means of at least three independent experiments  $\pm$  (SD).

| Mutant  | Common Name  | Pango Name | Mutations in the S-RDB                                                                                  |
|---------|--------------|------------|---------------------------------------------------------------------------------------------------------|
| Alpha   | UK           | B.1.1.7    | N501Y                                                                                                   |
| Beta    | South Africa | B.1.351    | K417N, E484K, N501Y                                                                                     |
| Gamma   | Brazil       | B.1.1.28.1 | K417T, E484K, N501Y                                                                                     |
| Delta   | India        | B.1.617.2  | L452R, T478K                                                                                            |
| Omicron | -            | B.1.1.529  | G339D, S371L, S373P, S375F, K417N, N440K, G446S, S477N, T478K, E484A, Q493R, G496S, Q498R, N501Y, Y505H |

**S8. Description of the SARS-CoV-2 mutants modelled in the evaluation of the S-RDB/ACE2 interaction**



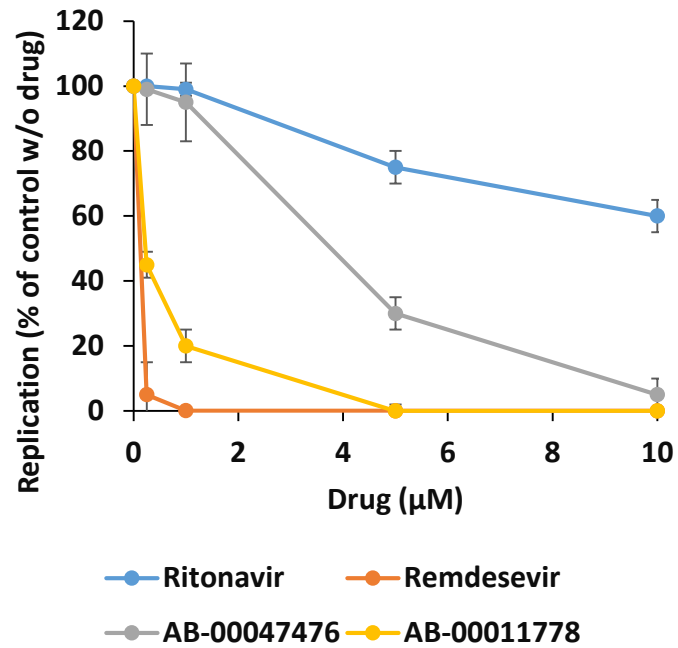

**S9. Comparison of the effects of Remdesivir, Ritonavir, AB-00011778 and AB-00047476 on SARS-CoV-2 replication in human pulmonary cells.** A549-ACE2 were incubated with the SARS-CoV-2 reference strain (MOI=1) and increasing concentrations of the tested compounds. Replication was evaluated by quantifying the viral genome copies after 24 hours. Data are reported as the means from two independent experiments and are expressed as a percentage of the control without molecule  $\pm$  the standard deviations.
